# Supplementary material for: snpGeneSets: An R Package for Genome-Wide Study Annotation
Source: G3 (Bethesda). 2016 Nov 2;6(12):4087–95. doi: 10.1534/g3.116.034694 (PMC5144977; doi:10.1534/g3.116.034694)
Supplement: Supplemental Material [file supp_g3.116.034694_TableS1.xlsx]

## Sheet: Supplementary table 1
SNP	p_value	PUBMEDID	report_Gene	snpMap_Chr	snpMap_Pos38	snpMap_Pos37	mapGene_ID	mapGene_Chr	mapGene_start	mapGene_end	mapGene_Strand	mapGene_Name	mapGene_KEGG
rs7636	5e-06	21490949	ACHE	7	100892456	100490077	43	7	100487615	100493754	-	ACHE	1
rs11708067	6e-08	22693455	ADCY5	3	123346931	123065778	111	3	123001143	123167924	-	ADCY5	1
rs11717195	2e-08	24509480	ADCY5	3	123363551	123082398	111	3	123001143	123167924	-	ADCY5	1
rs516946	2e-07	24509480	ANK1	8	41661730	41519248	286	8	41510744	41754280	-	ANK1	0
rs515071	1e-08	22456796	ANK1	8	41661944	41519462	286	8	41510744	41754280	-	ANK1	0
rs17045328	7e-06	21490949	CR2	1	207478831	207652176	1380	1	207627645	207663240	+	CR2	1
rs2284219	8e-06	24509480	CRHR2	7	30674820	30714436	1395	7	30691559	30739719	-	CRHR2	1
rs17168486	3e-07	24509480	DGKB	7	14858657	14898282	1607	7	14184674	14943281	-	DGKB	1
rs2055942	1e-06	23937595	GABRA4, COX7B2	4	46966033	46968050	2557	4	46920917	46996424	-	GABRA4	1
rs1799884	3e-09	23575436	GCK	7	44189469	44229068	2645	7	44183870	44229022	-	GCK	1
rs1799884	3e-10	23575436	GCK	7	44189469	44229068	2645	7	44183870	44229022	-	GCK	1
rs1799884	5e-18	23575436	GCK	7	44189469	44229068	2645	7	44183870	44229022	-	GCK	1
rs10886471	7e-09	22961080	GRK5	10	119389891	121149403	2869	10	120967197	121215131	+	GRK5	1
rs4812829	3e-10	21874001	HNF4A	20	44360627	42989267	3172	20	42984441	43061485	+	HNF4A	1
rs4812829	5e-08	24509480	HNF4A	20	44360627	42989267	3172	20	42984441	43061485	+	HNF4A	1
rs5215	5e-11	17463249	KCNJ11	11	17387083	17408630	3767	11	17406795	17410878	-	KCNJ11	1
rs5215	4e-07	18372903	KCNJ11	11	17387083	17408630	3767	11	17406795	17410878	-	KCNJ11	1
rs5215	3e-11	24509480	KCNJ11	11	17387083	17408630	3767	11	17406795	17410878	-	KCNJ11	1
rs5219	5e-07	19056611	KCNJ11	11	17388025	17409572	3767	11	17406795	17410878	-	KCNJ11	1
rs5219	1e-07	17463246	KCNJ11	11	17388025	17409572	3767	11	17406795	17410878	-	KCNJ11	1
rs5219	1e-09	19056611	KCNJ11	11	17388025	17409572	3767	11	17406795	17410878	-	KCNJ11	1
rs5219	7e-11	17463248	KCNJ11	11	17388025	17409572	3767	11	17406795	17410878	-	KCNJ11	1
rs231362	3e-13	20581827	KCNQ1	11	2670241	2691471	3784	11	2466221	2870340	+	KCNQ1	1
rs8181588	5e-09	24101674	KCNQ1	11	2810311	2831541	3784	11	2466221	2870340	+	KCNQ1	1
rs2237892	4e-29	23945395	KCNQ1	11	2818521	2839751	3784	11	2466221	2870340	+	KCNQ1	1
rs2237892	1e-07	22961080	KCNQ1	11	2818521	2839751	3784	11	2466221	2870340	+	KCNQ1	1
rs2237892	1e-26	19401414	KCNQ1	11	2818521	2839751	3784	11	2466221	2870340	+	KCNQ1	1
rs2237892	4e-06	21573907	KCNQ1	11	2818521	2839751	3784	11	2466221	2870340	+	KCNQ1	1
rs2237892	2e-42	18711367	KCNQ1	11	2818521	2839751	3784	11	2466221	2870340	+	KCNQ1	1
rs163182	2e-17	21799836	KCNQ1	11	2822986	2844216	3784	11	2466221	2870340	+	KCNQ1	1
rs163184	2e-14	24509480	KCNQ1	11	2825839	2847069	3784	11	2466221	2870340	+	KCNQ1	1
rs2237895	1e-09	20174558	KCNQ1	11	2835964	2857194	3784	11	2466221	2870340	+	KCNQ1	1
rs2237897	9e-15	24390345	KCNQ1	11	2837316	2858546	3784	11	2466221	2870340	+	KCNQ1	1
rs2237897	1e-16	18711366	KCNQ1	11	2837316	2858546	3784	11	2466221	2870340	+	KCNQ1	1
rs10830963	2e-07	24509480	MTNR1B	11	92975544	92708710	4544	11	92702789	92715948	+	MTNR1B	1
rs10923931	4e-08	18372903	NOTCH2, ADAM30	1	119975336	120517959	4853	1	120454176	120639880	-	NOTCH2	1
rs3786897	1e-08	22158537	PEPD	19	33402102	33893008	5184	19	33877855	34012799	-	PEPD	0
rs3773506	9e-06	21490949	PLS1	3	142712158	142431000	5357	3	142315229	142432506	+	PLS1	0
rs3132524	4e-09	24509480	TCF19, POU5F1	6	31168937	31136714	5460	6	31132114	31138451	-	POU5F1	0
rs1801282	2e-06	17463249	PPARG	3	12351626	12393125	5468	3	12329349	12475855	+	PPARG	1
rs1801282	2e-06	17463246	PPARG	3	12351626	12393125	5468	3	12329349	12475855	+	PPARG	1
rs1801282	6e-10	24509480	PPARG	3	12351626	12393125	5468	3	12329349	12475855	+	PPARG	1
rs1801282	2e-06	17463248	PPARG	3	12351626	12393125	5468	3	12329349	12475855	+	PPARG	1
rs17584499	9e-10	20174558	PTPRD	9	8879118	8879118	5789	9	8314246	10612723	-	PTPRD	0
rs649891	6e-06	21647700	PTPRD	9	10430602	10430602	5789	9	8314246	10612723	-	PTPRD	0
rs7593730	4e-08	20418489	ITGB6, RBMS1	2	160314943	161171454	5937	2	161128662	161350366	-	RBMS1	0
rs9552911	2e-08	23300278	SGCG, SACS	13	23290518	23864657	6445	13	23755060	23899304	+	SGCG	1
rs16861329	3e-08	21874001	ST6GAL1	3	186948673	186666461	6480	3	186648315	186796341	+	ST6GAL1	1
rs16861329	9e-06	24509480	ST64GAL1	3	186948673	186666461	6480	3	186648315	186796341	+	ST6GAL1	1
rs10993738	5e-06	22456796	SYK	9	90870958	93633240	6850	9	93564012	93660842	+	SYK	1
rs12427353	4e-06	24509480	HNF1A	12	120989098	121426901	6927	12	121415861	121440315	+	HNF1A	1
rs4430796	9e-10	24509480	HNF1B	17	37738049	36098040	6928	17	36046434	36105096	-	HNF1B	1
rs4430796	2e-06	20581827	HNF1B, TCF2	17	37738049	36098040	6928	17	36046434	36105096	-	HNF1B	1
rs4430796	4e-06	23945395	HNF1B	17	37738049	36098040	6928	17	36046434	36105096	-	HNF1B	1
rs4430796	2e-11	22961080	HNF1B	17	37738049	36098040	6928	17	36046434	36105096	-	HNF1B	1
rs34872471	8e-08	25483131	TCF7L2	10	112994312	114754071	6934	10	114709978	114927437	+	TCF7L2	1
rs7901695	1e-06	21347282	TCF7L2	10	112994329	114754088	6934	10	114709978	114927437	+	TCF7L2	1
rs7901695	1e-48	17463249	TCF7L2	10	112994329	114754088	6934	10	114709978	114927437	+	TCF7L2	1
rs4506565	5e-12	17554300	TCF7L2	10	112996282	114756041	6934	10	114709978	114927437	+	TCF7L2	1
rs7903146	2e-31	17463246	TCF7L2	10	112998590	114758349	6934	10	114709978	114927437	+	TCF7L2	1
rs7903146	6e-16	19056611	TCF7L2	10	112998590	114758349	6934	10	114709978	114927437	+	TCF7L2	1
rs7903146	5e-08	17668382	TCF7L2	10	112998590	114758349	6934	10	114709978	114927437	+	TCF7L2	1
rs7903146	2e-10	17460697	TCF7L2	10	112998590	114758349	6934	10	114709978	114927437	+	TCF7L2	1
rs7903146	3e-19	23300278	TCF7L2	10	112998590	114758349	6934	10	114709978	114927437	+	TCF7L2	1
rs7903146	3e-35	23300278	TCF7L2	10	112998590	114758349	6934	10	114709978	114927437	+	TCF7L2	1
rs7903146	3e-23	18372903	TCF7L2	10	112998590	114758349	6934	10	114709978	114927437	+	TCF7L2	1
rs7903146	9e-75	23300278	TCF7L2	10	112998590	114758349	6934	10	114709978	114927437	+	TCF7L2	1
rs7903146	6e-22	23300278	TCF7L2	10	112998590	114758349	6934	10	114709978	114927437	+	TCF7L2	1
rs7903146	1e-14	24390345	TCF7L2	10	112998590	114758349	6934	10	114709978	114927437	+	TCF7L2	1
rs7903146	2e-34	17293876	TCF7L2	10	112998590	114758349	6934	10	114709978	114927437	+	TCF7L2	1
rs7903146	8e-12	19401414	TCF7L2	10	112998590	114758349	6934	10	114709978	114927437	+	TCF7L2	1
rs7903146	2e-15	23945395	TCF7L2	10	112998590	114758349	6934	10	114709978	114927437	+	TCF7L2	1
rs7903146	2e-40	22693455	TCF7L2	10	112998590	114758349	6934	10	114709978	114927437	+	TCF7L2	1
rs7903146	2e-38	23300278	TCF7L2	10	112998590	114758349	6934	10	114709978	114927437	+	TCF7L2	1
rs7903146	1e-35	23209189	TCF7L2	10	112998590	114758349	6934	10	114709978	114927437	+	TCF7L2	1
rs7903146	4e-21	22693455	TCF7L2	10	112998590	114758349	6934	10	114709978	114927437	+	TCF7L2	1
rs7903146	2e-51	20581827	TCF7L2	10	112998590	114758349	6934	10	114709978	114927437	+	TCF7L2	1
rs7903146	2e-15	22101970	TCF7L2	10	112998590	114758349	6934	10	114709978	114927437	+	TCF7L2	1
rs7903146	1e-08	17463248	TCF7L2	10	112998590	114758349	6934	10	114709978	114927437	+	TCF7L2	1
rs7903146	9e-30	19056611	TCF7L2	10	112998590	114758349	6934	10	114709978	114927437	+	TCF7L2	1
rs7903146	8e-75	24509480	TCF7L2	10	112998590	114758349	6934	10	114709978	114927437	+	TCF7L2	1
rs11165354	4e-06	23209189	TGFBR3	1	91728765	92194322	7049	1	92145900	92371559	-	TGFBR3	0
rs7612463	7e-09	24509480	UBE2E2	3	23294959	23336450	7325	3	23244498	23632296	+	UBE2E2	1
rs4458523	2e-09	24509480	WFS1	4	6288259	6289986	7466	4	6271577	6304992	+	WFS1	0
rs1801214	3e-08	20581827	WFS1	4	6301295	6303022	7466	4	6271577	6304992	+	WFS1	0
rs7957197	2e-08	20581827	HNF1A	12	121022883	121460686	8638	12	121458095	121477045	-	OASL	0
rs8042680	2e-10	20581827	PRC1	15	90978107	91521337	9055	15	91509268	91537881	-	PRC1	0
rs1802295	4e-08	21874001	VPS26A	10	69171718	70931474	9559	10	70883908	70932617	+	VPS26A	0
rs10460009	9e-06	21490949	LPIN2	18	2948031	2948029	9663	18	2916992	3013313	-	LPIN2	0
rs7403531	4e-09	22961080	RASGRP1	15	38530704	38822905	10125	15	38780302	38857661	-	RASGRP1	1
rs1727313	1e-08	24509480	MPHOSPH9	12	123156306	123640853	10198	12	123640943	123717785	-	MPHOSPH9	0
rs2028299	5e-07	24509480	AP3S2	15	89831025	90374257	10239	15	90373831	90437617	-	AP3S2	1
rs2028299	3e-06	23945395	AP3S2	15	89831025	90374257	10239	15	90373831	90437617	-	AP3S2	1
rs2028299	2e-11	21874001	AP3S2	15	89831025	90374257	10239	15	90373831	90437617	-	AP3S2	1
rs6815464	2e-20	22158537	MAEA	4	1316113	1309901	10296	4	1283642	1333925	+	MAEA	0
rs6815464	2e-07	23945395	MAEA	4	1316113	1309901	10296	4	1283642	1333925	+	MAEA	0
rs7178572	1e-08	22693455	HMG20A	15	77454848	77747190	10363	15	77713018	77777945	+	HMG20A	0
rs7178572	2e-11	24509480	HMG20A	15	77454848	77747190	10363	15	77713018	77777945	+	HMG20A	0
rs7178572	7e-11	21874001	HMG20A	15	77454848	77747190	10363	15	77713018	77777945	+	HMG20A	0
rs7119	5e-07	21490949	HMG20A	15	77485290	77777632	10363	15	77713018	77777945	+	HMG20A	0
rs4402960	1e-06	19401414	IGF2BP2	3	185793899	185511687	10644	3	185361527	185542827	-	IGF2BP2	0
rs4402960	2e-09	17463246	IGF2BP2	3	185793899	185511687	10644	3	185361527	185542827	-	IGF2BP2	0
rs4402960	9e-16	17463248	IGF2BP2	3	185793899	185511687	10644	3	185361527	185542827	-	IGF2BP2	0
rs4402960	8e-08	18372903	IGF2BP2	3	185793899	185511687	10644	3	185361527	185542827	-	IGF2BP2	0
rs4402960	9e-16	17463249	IGF2BP2	3	185793899	185511687	10644	3	185361527	185542827	-	IGF2BP2	0
rs4402960	1e-17	24509480	IGF2BP2	3	185793899	185511687	10644	3	185361527	185542827	-	IGF2BP2	0
rs4402960	3e-09	22693455	IG2BP2	3	185793899	185511687	10644	3	185361527	185542827	-	IGF2BP2	0
rs1470579	5e-06	23300278	IGF2BP2	3	185811292	185529080	10644	3	185361527	185542827	-	IGF2BP2	0
rs1470579	4e-07	23300278	IGF2BP2	3	185811292	185529080	10644	3	185361527	185542827	-	IGF2BP2	0
rs1470579	2e-13	23300278	IGF2BP2	3	185811292	185529080	10644	3	185361527	185542827	-	IGF2BP2	0
rs1470579	4e-09	23300278	IGF2BP2	3	185811292	185529080	10644	3	185361527	185542827	-	IGF2BP2	0
rs1470579	2e-19	23300278	IGF2BP2	3	185811292	185529080	10644	3	185361527	185542827	-	IGF2BP2	0
rs1470579	2e-09	20581827	IGF2BP2	3	185811292	185529080	10644	3	185361527	185542827	-	IGF2BP2	0
rs1470579	5e-14	23945395	IGF2BP2	3	185811292	185529080	10644	3	185361527	185542827	-	IGF2BP2	0
rs6769511	1e-09	18711366	IGF2BP2	3	185812502	185530290	10644	3	185361527	185542827	-	IGF2BP2	0
rs1374910	1e-07	21573907	IGF2BP2	3	185813873	185531661	10644	3	185361527	185542827	-	IGF2BP2	0
rs231362	3e-13	20581827	KCNQ1	11	2670241	2691471	10984	11	2629558	2721228	-	KCNQ1OT1	0
rs17106184	4e-09	24509480	FAF1	1	50444313	50909985	11124	1	50906935	51425936	-	FAF1	0
rs6712932	6e-06	17668382	intergenic	2	105221141	105837598	11250	2	105839595	105860085	+	GPR45	0
rs35209784	5e-06	25483131	DAAM1	14	59285112	59751830	23002	14	59655329	59838123	+	DAAM1	1
rs470089	9e-06	23386860	SULT4A1	22	43852624	44248504	25830	22	44220387	44258378	-	SULT4A1	0
rs11787792	2e-10	23945395	GPSM1	9	136357696	139252148	26086	9	139221932	139254057	+	GPSM1	0
rs12899811	6e-07	24509480	PRC1	15	91000846	91544076	26276	15	91541774	91565833	-	VPS33B	0
rs17177078	5e-06	23386860	TNRC6A	16	24799360	24810681	27327	16	24741028	24837548	+	TNRC6A	0
rs7630877	7e-06	21490949	PEX5L	3	179943530	179661318	51555	3	179512746	179754841	-	PEX5L	0
rs11634397	2e-09	20581827	ZFAND6	15	80139880	80432222	54469	15	80351910	80430735	+	ZFAND6	0
rs702634	7e-09	24509480	ARL15	5	53975590	53271420	54622	5	53180578	53606403	-	ARL15	0
rs9348440	3e-19	23575436	CDKAL1	6	20641105	20641336	54901	6	20534688	21232635	+	CDKAL1	0
rs9295474	9e-06	21490949	CDKAL1	6	20652486	20652717	54901	6	20534688	21232635	+	CDKAL1	0
rs4712523	7e-20	19401414	CDKAL1	6	20657333	20657564	54901	6	20534688	21232635	+	CDKAL1	0
rs4712524	3e-10	18711366	CDKAL1	6	20657634	20657865	54901	6	20534688	21232635	+	CDKAL1	0
rs10946398	7e-07	19056611	CDKAL	6	20660803	20661034	54901	6	20534688	21232635	+	CDKAL1	0
rs10946398	1e-08	17463249	CDKAL1	6	20660803	20661034	54901	6	20534688	21232635	+	CDKAL1	0
rs7754840	7e-10	22961080	CDKAL1	6	20661019	20661250	54901	6	20534688	21232635	+	CDKAL1	0
rs7754840	2e-13	23945395	CDKAL1	6	20661019	20661250	54901	6	20534688	21232635	+	CDKAL1	0
rs7754840	4e-11	17463248	CDKAL1	6	20661019	20661250	54901	6	20534688	21232635	+	CDKAL1	0
rs7754840	4e-11	17463246	CDKAL1	6	20661019	20661250	54901	6	20534688	21232635	+	CDKAL1	0
rs7756992	2e-26	24509480	CDKAL1	6	20679478	20679709	54901	6	20534688	21232635	+	CDKAL1	0
rs7756992	8e-09	17460697	CDKAL1	6	20679478	20679709	54901	6	20534688	21232635	+	CDKAL1	0
rs7766070	9e-09	25483131	CDKAL1	6	20686342	20686573	54901	6	20534688	21232635	+	CDKAL1	0
rs7766070	7e-10	22693455	CDKAL1	6	20686342	20686573	54901	6	20534688	21232635	+	CDKAL1	0
rs7766070	6e-11	22693455	CDKAL1	6	20686342	20686573	54901	6	20534688	21232635	+	CDKAL1	0
rs10440833	2e-22	20581827	CDKAL1	6	20687890	20688121	54901	6	20534688	21232635	+	CDKAL1	0
rs6931514	1e-11	18372903	CDKAL1	6	20703721	20703952	54901	6	20534688	21232635	+	CDKAL1	0
rs9465871	3e-07	17554300	CDKAL1	6	20717024	20717255	54901	6	20534688	21232635	+	CDKAL1	0
rs3792615	9e-06	21490949	MARCH1	4	163611649	164532801	55016	4	164445450	165305093	-	MARCH1	0
rs34669198	1e-06	25760438	SRBD1	2	45521138	45748277	55133	2	45615819	45838434	-	SRBD1	0
rs73954691	3e-06	25483131	LIMS2	2	127663671	128421245	55679	2	128395996	128439360	-	LIMS2	0
rs12571751	2e-10	24509480	ZMIZ1	10	79182874	80942631	57178	10	80828751	81076285	+	ZMIZ1	0
rs6426514	2e-06	23300278	RHOU	1	228744368	228880115	58480	1	228780394	228882416	+	RHOU	0
rs10510110	1e-07	24509480	PLEKHA1	10	122432914	124192430	59338	10	124134094	124191871	+	PLEKHA1	0
rs9470794	2e-10	22158537	ZFAND3	6	38139068	38106844	60685	6	37787272	38161637	+	ZFAND3	0
rs391300	3e-09	20174558	SRR	17	2312964	2216258	63826	17	2207244	2228553	+	SRR	1
rs7578597	1e-09	18372903	THADA	2	43505684	43732823	63892	2	43457975	43823185	-	THADA	0
rs8050136	1e-12	17463248	FTO	16	53782363	53816275	79068	16	53737875	54148379	+	FTO	0
rs8050136	7e-14	17463249	FTO	16	53782363	53816275	79068	16	53737875	54148379	+	FTO	0
rs8050136	7e-06	18372903	FTO	16	53782363	53816275	79068	16	53737875	54148379	+	FTO	0
rs8050136	6e-06	23209189	FTO	16	53782363	53816275	79068	16	53737875	54148379	+	FTO	0
rs8050136	2e-17	19056611	FTO	16	53782363	53816275	79068	16	53737875	54148379	+	FTO	0
rs9936385	1e-12	24509480	FTO	16	53785257	53819169	79068	16	53737875	54148379	+	FTO	0
rs9939609	2e-07	17554300	FTO	16	53786615	53820527	79068	16	53737875	54148379	+	FTO	0
rs9939609	1e-20	22693455	FTO	16	53786615	53820527	79068	16	53737875	54148379	+	FTO	0
rs11642841	3e-08	20581827	FTO	16	53811575	53845487	79068	16	53737875	54148379	+	FTO	0
rs12027542	4e-07	21490949	PCNXL2	1	233204408	233340154	80003	1	233119855	233431459	-	PCNXL2	0
rs16955379	3e-07	22158537	CMIP	16	81455768	81489373	80790	16	81478775	81745367	+	CMIP	0
rs6723108	7e-08	23209189	TMEM163	2	134722410	135479980	81615	2	135213330	135478219	-	TMEM163	0
rs1535500	2e-08	22158537	KCNK16	6	39316274	39284050	83795	6	39282474	39290330	-	KCNK16	0
rs1535500	8e-06	24509480	KCNK16	6	39316274	39284050	83795	6	39282474	39290330	-	KCNK16	0
rs319598	2e-06	24509480	PCBD2	5	134904545	134240235	84105	5	134240810	134298336	+	PCBD2	0
rs1535500	2e-08	22158537	KCNK16	6	39316274	39284050	89822	6	39266777	39282237	-	KCNK17	0
rs1535500	8e-06	24509480	KCNK16	6	39316274	39284050	89822	6	39266777	39282237	-	KCNK17	0
rs12010175	2e-09	22961080	FAM58A	X	153597180	152862638	92002	X	152853383	152864632	-	FAM58A	0
rs1861612	7e-08	24101674	DNER	2	229657682	230522398	92737	2	230222345	230579286	-	DNER	0
rs7845219	6e-08	24509480	TP53INP1	8	94925274	95937502	94241	8	95938200	95961615	-	TP53INP1	0
rs896854	1e-09	20581827	TP53INP1	8	94948283	95960511	94241	8	95938200	95961615	-	TP53INP1	0
rs1327796	3e-06	22456796	PALM2, AKAP2	9	109764009	112526289	114299	9	112403068	112713756	+	PALM2	0
rs275856	1e-06	25483131	OSBPL1A	18	24259188	21839152	114876	18	21742009	21977846	-	OSBPL1A	0
rs1552224	1e-07	24509480	CENTD2, ARAP1	11	72722053	72433098	116985	11	72396114	72463465	-	ARAP1	1
rs1552224	1e-22	20581827	CENTD2	11	72722053	72433098	116985	11	72396114	72463465	-	ARAP1	1
rs1048886	3e-08	21490949	C6orf57	6	70579486	71289189	135154	6	71276625	71298606	+	C6ORF57	0
rs13036344	9e-06	25760438	COMMD7	20	32725930	31313737	149951	20	31290493	31331814	-	COMMD7	0
rs824248	8e-06	24390345	LINGO2	9	28772702	28772700	158038	9	27948084	29212998	-	LINGO2	0
rs75493593	5e-15	24390345	SLC16A13, SLC16A11	17	7041768	6945087	162515	17	6944949	6947242	-	SLC16A11	0
rs13266634	7e-06	19056611	SLC30A8	8	117172544	118184783	169026	8	117962512	118188953	+	SLC30A8	0
rs13266634	2e-14	19401414	SLC30A8	8	117172544	118184783	169026	8	117962512	118188953	+	SLC30A8	0
rs13266634	6e-08	17293876	SLC30A8	8	117172544	118184783	169026	8	117962512	118188953	+	SLC30A8	0
rs13266634	5e-08	17463248	SLC30A8	8	117172544	118184783	169026	8	117962512	118188953	+	SLC30A8	0
rs13266634	3e-06	17460697	SLC30A8	8	117172544	118184783	169026	8	117962512	118188953	+	SLC30A8	0
rs13266634	5e-07	23945395	SLC30A8	8	117172544	118184783	169026	8	117962512	118188953	+	SLC30A8	0
rs13266634	5e-08	17463249	SLC30A8	8	117172544	118184783	169026	8	117962512	118188953	+	SLC30A8	0
rs13266634	5e-08	17463246	SLC30A8	8	117172544	118184783	169026	8	117962512	118188953	+	SLC30A8	0
rs3802177	1e-08	20581827	SLC30A8	8	117172786	118185025	169026	8	117962512	118188953	+	SLC30A8	0
rs3802177	4e-08	22693455	SLC30A8	8	117172786	118185025	169026	8	117962512	118188953	+	SLC30A8	0
rs3802177	2e-18	24509480	SLC30A8	8	117172786	118185025	169026	8	117962512	118188953	+	SLC30A8	0
rs7041847	2e-14	22158537	GLIS3	9	4287466	4287466	169792	9	3824128	4300036	-	GLIS3	0
rs7041847	5e-06	24509480	GLIS3	9	4287466	4287466	169792	9	3824128	4300036	-	GLIS3	0
rs10814916	6e-12	22961080	GLIS3	9	4293150	4293150	169792	9	3824128	4300036	-	GLIS3	0
rs312457	8e-13	23945395	SLC16A13	17	7037074	6940393	201232	17	6939394	6943440	+	SLC16A13	0
rs75493593	5e-15	24390345	SLC16A13, SLC16A11	17	7041768	6945087	201232	17	6939394	6943440	+	SLC16A13	0
rs1531343	4e-09	20581827	HMGA2	12	65781114	66174894	204010	12	66151800	66220754	-	RPSAP52	0
rs2261181	4e-08	24509480	HMGA2	12	65818538	66212318	204010	12	66151800	66220754	-	RPSAP52	0
rs864745	5e-14	18372903	JAZF1	7	28140937	28180556	221895	7	27870192	28220437	-	JAZF1	0
rs849134	3e-09	20581827	JAZF1	7	28156603	28196222	221895	7	27870192	28220437	-	JAZF1	0
rs849135	2e-09	24509480	JAZF1	7	28156794	28196413	221895	7	27870192	28220437	-	JAZF1	0
rs10741243	5e-06	21490949	TCERG1L	10	131149699	132947962	256536	10	132890655	133109984	-	TCERG1L	0
rs2074356	1e-16	23575436	C12orf51	12	112207597	112645401	283450	12	112597992	112820113	-	HECTD4	0
rs2074356	6e-09	23575436	C12orf51	12	112207597	112645401	283450	12	112597992	112820113	-	HECTD4	0
rs2074356	6e-14	23575436	C12orf51	12	112207597	112645401	283450	12	112597992	112820113	-	HECTD4	0
rs8090011	8e-09	22693455	LAMA1	18	7068463	7068462	284217	18	6941743	7117813	-	LAMA1	1
rs472265	9e-06	21490949	FLJ16165	19	39090097	39580737	390928	19	39574945	39602129	+	PAPL	0
rs12304921	7e-06	17554300	NR	12	50963759	51357542	613227	12	51346200	51364668	+	HIGD1C	0
rs516946	2e-07	24509480	ANK1	8	41661730	41519248	619554	8	41517959	41518026	-	MIR486	0
rs515071	1e-08	22456796	ANK1	8	41661944	41519462	619554	8	41517959	41518026	-	MIR486	0
rs7578326	5e-20	20581827	IRS1	2	226155937	227020653	646736	2	227007510	227044778	+	LOC646736	0
rs10460009	9e-06	21490949	LPIN2	18	2948031	2948029	727896	18	2943210	2946621	-	LOC727896	0
rs11677370	3e-06	21490949	intergenic	2	3793830	3841420	728597	2	3751188	3895001	+	DCDC2C	0
rs4273712	3e-06	24509480	C6orf173	6	126643364	126964510	728666	6	126964786	126965433	+	PRELID1P1	0
rs4457053	3e-12	20581827	ZBED3	5	77129124	76424949	728723	5	76382623	76444176	+	ZBED3-AS1	0
rs564398	1e-06	17463249	CDKN2A, CDKN2B	9	22029548	22029547	100048912	9	21994790	22121096	+	CDKN2B-AS1	0
rs1525739	6e-06	23386860	AGR2, AGR3	7	16850188	16889812	100287613	7	16889636	16890425	-	LOC100287613	0
rs2075423	2e-06	24509480	PROX1	1	213981376	214154719	100505832	1	213995227	214160147	-	PROX1-AS1	0
rs4607103	1e-08	18372903	ADAMTS9	3	64726228	64711904	100507098	3	64670546	64997143	+	ADAMTS9-AS2	0
rs8042680	2e-10	20581827	PRC1	15	90978107	91521337	100507118	15	91509599	91531854	+	PRC1-AS1	0
rs2028299	5e-07	24509480	AP3S2	15	89831025	90374257	100526783	15	90373831	90456222	-	C15ORF38-AP3S2	0
rs2028299	3e-06	23945395	AP3S2	15	89831025	90374257	100526783	15	90373831	90456222	-	C15ORF38-AP3S2	0
rs2028299	2e-11	21874001	AP3S2	15	89831025	90374257	100526783	15	90373831	90456222	-	C15ORF38-AP3S2	0
rs138128600	2e-07	25760438	KLF5, KLF12	13	73190488	73764625	100862676	13	73765665	73765804	+	RNU4-10P	0
rs13424957	3e-06	21347282	intergenic	2	164893880	165750390	100873381	2	165752187	165752287	-	RNA5SP111	0
rs896854	1e-09	20581827	TP53INP1	8	94948283	95960511	101927002	8	95961776	95970237	+	LOC101927002	0
rs2796441	2e-06	24509480	TLE1	9	81694033	84308948	101927502	9	84304593	84391815	+	LOC101927502	0
rs12027542	4e-07	21490949	PCNXL2	1	233204408	233340154	101927736	1	233336174	233342252	+	LOC101927736	0
rs791595	3e-13	23945395	MIR129, LEP	7	128222749	127862802	101928423	7	127846863	127864484	+	LOC101928423	0
rs13424957	3e-06	21347282	intergenic	2	164893880	165750390	101929633	2	165701581	165815789	+	LOC101929633	0
rs7542900	6e-06	22238593	SLC44A3, F3	1	94604485	95070041	NA	NA	NA	NA	NA	NA	0
rs11240074	6e-06	25760438	BCL9, CHD1L	1	147524657	146996480	NA	NA	NA	NA	NA	NA	0
rs2820446	2e-06	24509480	LYPLAL1	1	219575476	219748818	NA	NA	NA	NA	NA	NA	0
rs11257655	7e-09	22961080	CDC123	10	12265895	12307894	NA	NA	NA	NA	NA	NA	0
rs11257655	3e-09	24509480	CDC123	10	12265895	12307894	NA	NA	NA	NA	NA	NA	0
rs10906115	1e-08	20862305	CDC123, CAMK1D	10	12272998	12314997	NA	NA	NA	NA	NA	NA	0
rs12779790	1e-10	18372903	CDC123, CAMK1D	10	12286011	12328010	NA	NA	NA	NA	NA	NA	0
rs2812533	5e-06	24509480	C10orf35	10	69692529	71452285	NA	NA	NA	NA	NA	NA	0
rs10788575	9e-06	24509480	PTEN	10	88008827	89768584	NA	NA	NA	NA	NA	NA	0
rs6583826	7e-06	21490949	KIF11	10	92588073	94347830	NA	NA	NA	NA	NA	NA	0
rs1111875	3e-06	17293876	HHEX	10	92703125	94462882	NA	NA	NA	NA	NA	NA	0
rs1111875	6e-10	17463246	HHEX	10	92703125	94462882	NA	NA	NA	NA	NA	NA	0
rs1111875	7e-12	19401414	HHEX	10	92703125	94462882	NA	NA	NA	NA	NA	NA	0
rs1111875	2e-08	23945395	HHEX	10	92703125	94462882	NA	NA	NA	NA	NA	NA	0
rs1111875	3e-19	24509480	HHEX, IDE	10	92703125	94462882	NA	NA	NA	NA	NA	NA	0
rs1111875	6e-10	17463248	HHEX	10	92703125	94462882	NA	NA	NA	NA	NA	NA	0
rs5015480	5e-06	17463249	HHEX	10	92705802	94465559	NA	NA	NA	NA	NA	NA	0
rs5015480	1e-15	20581827	HHEX, IDE	10	92705802	94465559	NA	NA	NA	NA	NA	NA	0
rs5015480	2e-09	22693455	HHEX	10	92705802	94465559	NA	NA	NA	NA	NA	NA	0
rs5015480	9e-06	20862305	HHEX	10	92705802	94465559	NA	NA	NA	NA	NA	NA	0
rs5015480	7e-08	18372903	HHEX	10	92705802	94465559	NA	NA	NA	NA	NA	NA	0
rs2722769	2e-06	22238593	GALNTL4, LOC729013	11	11206827	11228374	NA	NA	NA	NA	NA	NA	0
rs9300039	6e-08	17463248	intergenic	11	41893816	41915366	NA	NA	NA	NA	NA	NA	0
rs1387153	8e-15	20581827	MTNR1B	11	92940662	92673828	NA	NA	NA	NA	NA	NA	0
rs10830962	5e-13	23575436	MTNR1B	11	92965261	92698427	NA	NA	NA	NA	NA	NA	0
rs10830962	3e-12	23575436	MTNR1B	11	92965261	92698427	NA	NA	NA	NA	NA	NA	0
rs7107217	3e-07	22238593	TMEM45B, BARX2	11	129603795	129473690	NA	NA	NA	NA	NA	NA	0
rs10842994	8e-06	24509480	KLHDC5	12	27812217	27965150	NA	NA	NA	NA	NA	NA	0
rs7978895	9e-06	25760438	ADAMTS20	12	43176712	43570515	NA	NA	NA	NA	NA	NA	0
rs1153188	2e-07	18372903	DCD	12	54705212	55098996	NA	NA	NA	NA	NA	NA	0
rs1495377	7e-06	17554300	NR	12	71183321	71577101	NA	NA	NA	NA	NA	NA	0
rs4760790	4e-06	20581827	LGR5, TSPAN8	12	71241014	71634794	NA	NA	NA	NA	NA	NA	0
rs7961581	1e-09	18372903	LGR5, TSPAN8	12	71269322	71663102	NA	NA	NA	NA	NA	NA	0
rs12229654	9e-13	23575436	MYL2	12	110976657	111414461	NA	NA	NA	NA	NA	NA	0
rs11066453	5e-09	23575436	OAS1	12	112927816	113365621	NA	NA	NA	NA	NA	NA	0
rs7305618	2e-08	21573907	HNF1A	12	120965129	121402932	NA	NA	NA	NA	NA	NA	0
rs10507349	2e-07	24509480	RNF6	13	26207391	26781528	NA	NA	NA	NA	NA	NA	0
rs79490558	1e-06	25760438	GTF2F2, TPT1	13	45312051	45886186	NA	NA	NA	NA	NA	NA	0
rs78319313	3e-06	25760438	LINC00348	13	71021178	71595310	NA	NA	NA	NA	NA	NA	0
rs1359790	6e-06	24509480	SPRY2	13	80143021	80717156	NA	NA	NA	NA	NA	NA	0
rs1359790	6e-09	20862305	SPRY2	13	80143021	80717156	NA	NA	NA	NA	NA	NA	0
rs11454281	9e-06	25760438	intergenic	13	64920645	NA	NA	NA	NA	NA	NA	NA	0
rs730570	8e-06	21573907	C14orf70	14	100676553	101142890	NA	NA	NA	NA	NA	NA	0
rs7163757	4e-06	24509480	C2CD4A	15	62099409	62391608	NA	NA	NA	NA	NA	NA	0
rs7172432	1e-06	23945395	C2CD4B, C2CD4A	15	62104190	62396389	NA	NA	NA	NA	NA	NA	0
rs7172432	9e-14	20818381	C2CD4B, C2CD4A	15	62104190	62396389	NA	NA	NA	NA	NA	NA	0
rs1436955	7e-07	20862305	C2CD4B	15	62112183	62404382	NA	NA	NA	NA	NA	NA	0
rs1436953	8e-06	21799836	C2CD4B, C2CD4A	15	62121815	62414014	NA	NA	NA	NA	NA	NA	0
rs189178161	8e-06	25760438	CPPED1, SNX29	16	12624996	12718853	NA	NA	NA	NA	NA	NA	0
rs17797882	9e-07	22158537	WWOX	16	79373021	79406918	NA	NA	NA	NA	NA	NA	0
rs623323	4e-06	23300278	NXN	17	796780	700020	NA	NA	NA	NA	NA	NA	0
rs6506284	3e-06	25760438	C18orf42	18	5030024	5030023	NA	NA	NA	NA	NA	NA	0
rs12970134	3e-08	24509480	MC4R	18	60217517	57884750	NA	NA	NA	NA	NA	NA	0
rs8108269	5e-06	24509480	GIPR	19	45655255	46158513	NA	NA	NA	NA	NA	NA	0
rs10190052	2e-07	24509480	TMEM18	2	646674	646674	NA	NA	NA	NA	NA	NA	0
rs243088	3e-06	24509480	BCL11A	2	60341610	60568745	NA	NA	NA	NA	NA	NA	0
rs243021	3e-15	20581827	BCL11A	2	60357684	60584819	NA	NA	NA	NA	NA	NA	0
rs7560163	7e-09	22238593	RBM43, RND3	2	150781422	151637936	NA	NA	NA	NA	NA	NA	0
rs3923113	2e-06	24509480	GRB14	2	164645339	165501849	NA	NA	NA	NA	NA	NA	0
rs3923113	1e-08	21874001	GRB14	2	164645339	165501849	NA	NA	NA	NA	NA	NA	0
rs75260059	9e-07	25760438	TYW5, SATB2	2	199751534	200616257	NA	NA	NA	NA	NA	NA	0
rs2943640	7e-09	24509480	IRS1	2	226228869	227093585	NA	NA	NA	NA	NA	NA	0
rs6017317	1e-11	22158537	FITM2, R3HDML, HNF4A	20	44318326	42946966	NA	NA	NA	NA	NA	NA	0
rs328506	2e-06	23300278	CTCFL, RBM38, HMG1L1, PCK1	20	57454548	56029604	NA	NA	NA	NA	NA	NA	0
rs2833610	4e-06	21490949	HUNK	21	32012873	33385186	NA	NA	NA	NA	NA	NA	0
rs17036101	2e-07	18372903	SYN2, PPARG	3	12236345	12277845	NA	NA	NA	NA	NA	NA	0
rs13081389	2e-07	20581827	PPARG	3	12248301	12289800	NA	NA	NA	NA	NA	NA	0
rs6780569	4e-07	23945395	UBE2E2	3	23156993	23198484	NA	NA	NA	NA	NA	NA	0
rs358806	3e-06	17554300	NR	3	55279372	55313400	NA	NA	NA	NA	NA	NA	0
rs831571	8e-11	22158537	PSMD6	3	64062621	64048297	NA	NA	NA	NA	NA	NA	0
rs12496230	4e-06	25760438	LRIG1, KBTBD8	3	66779484	66829908	NA	NA	NA	NA	NA	NA	0
rs2063640	3e-06	21490949	ZPLD1	3	102484201	102203045	NA	NA	NA	NA	NA	NA	0
rs138306797	3e-06	25760438	IGF2BP2	3	185827931	185545719	NA	NA	NA	NA	NA	NA	0
rs149049329	2e-06	25760438	BCL6, LPP	3	187880139	187597927	NA	NA	NA	NA	NA	NA	0
rs6808574	6e-09	24509480	LPP	3	188022735	187740523	NA	NA	NA	NA	NA	NA	0
rs7656416	1e-08	22456796	MGC21675	4	1260747	1254535	NA	NA	NA	NA	NA	NA	0
rs7659604	9e-06	17554300	NR	4	121744359	122665514	NA	NA	NA	NA	NA	NA	0
rs6813195	4e-14	24509480	TMEM154	4	152599323	153520475	NA	NA	NA	NA	NA	NA	0
rs10461617	4e-06	23209189	MAP3K1	5	56808481	56104308	NA	NA	NA	NA	NA	NA	0
rs4703911	7e-06	25760438	TMEM167A, XRCC4, ATP6AP1L	5	82717035	82012854	NA	NA	NA	NA	NA	NA	0
rs17053082	4e-07	23300278	intergenic	5	155967220	155394230	NA	NA	NA	NA	NA	NA	0
rs17053082	4e-07	23300278	intergenic	5	155967220	155394230	NA	NA	NA	NA	NA	NA	0
rs9502570	1e-09	24509480	RREB1, SSR1	6	7258384	7258617	NA	NA	NA	NA	NA	NA	0
rs3916765	1e-06	22693455	HLA-DQA2	6	32717773	32685550	NA	NA	NA	NA	NA	NA	0
rs9472138	4e-06	18372903	VEGFA	6	43844025	43811762	NA	NA	NA	NA	NA	NA	0
rs9472138	2e-07	24509480	VEGFA	6	43844025	43811762	NA	NA	NA	NA	NA	NA	0
rs149358103	5e-06	25760438	SOCS5P5, MARCKS	6	113586847	113908049	NA	NA	NA	NA	NA	NA	0
rs6937795	7e-06	24509480	IL20RA	6	136970143	137291281	NA	NA	NA	NA	NA	NA	0
rs642858	2e-06	21490949	intergenic	6	139952510	140273647	NA	NA	NA	NA	NA	NA	0
rs9478961	2e-07	25760438	MTHFD1L, AKAP12	6	151135457	151456593	NA	NA	NA	NA	NA	NA	0
rs7795991	7e-07	24509480	ETV1	7	13861106	13900731	NA	NA	NA	NA	NA	NA	0
rs6467136	5e-11	22158537	PAX4, GCC1	7	127524904	127164958	NA	NA	NA	NA	NA	NA	0
rs10229583	2e-10	23532257	ARF5, PAX4, SND1	7	127606849	127246903	NA	NA	NA	NA	NA	NA	0
rs972283	2e-10	20581827	KLF14	7	130782095	130466854	NA	NA	NA	NA	NA	NA	0
rs1561927	1e-07	24509480	TMEM75	8	128555832	129568078	NA	NA	NA	NA	NA	NA	0
rs4527850	2e-06	23300278	WISP1	8	133184606	134196849	NA	NA	NA	NA	NA	NA	0
rs7020996	2e-07	18372903	CDKN2A, CDKN2B	9	22129580	22129579	NA	NA	NA	NA	NA	NA	0
rs2383208	3e-06	23209189	CDKN2A	9	22132077	22132076	NA	NA	NA	NA	NA	NA	0
rs2383208	2e-29	19401414	CDKN2A, CDKN2B	9	22132077	22132076	NA	NA	NA	NA	NA	NA	0
rs2383208	3e-17	22961080	CDKN2B	9	22132077	22132076	NA	NA	NA	NA	NA	NA	0
rs10965250	1e-10	20581827	CDKN2A, CDKN2B	9	22133285	22133284	NA	NA	NA	NA	NA	NA	0
rs10811661	5e-08	17463246	CDKN2A, CDKN2B	9	22134095	22134094	NA	NA	NA	NA	NA	NA	0
rs10811661	8e-15	17463248	CDKN2A, CDKN2B	9	22134095	22134094	NA	NA	NA	NA	NA	NA	0
rs10811661	1e-27	24509480	CDKN2A, CDKN2B	9	22134095	22134094	NA	NA	NA	NA	NA	NA	0
rs10811661	5e-06	17463249	CDKN2A, CDKN2B	9	22134095	22134094	NA	NA	NA	NA	NA	NA	0
rs10811661	1e-18	23945395	CDKN2A, CDKN2B	9	22134095	22134094	NA	NA	NA	NA	NA	NA	0
rs10811661	7e-07	19056611	CDKN2B	9	22134095	22134094	NA	NA	NA	NA	NA	NA	0
rs1333051	6e-10	21573907	CDKN2A, CDKN2B	9	22136490	22136489	NA	NA	NA	NA	NA	NA	0
rs7018475	3e-08	22293688	CDKN2B	9	22137686	22137685	NA	NA	NA	NA	NA	NA	0
rs17791513	3e-08	24509480	TLE4	9	79290675	81905590	NA	NA	NA	NA	NA	NA	0
rs13292136	3e-08	20581827	CHCHD9	9	79337213	81952128	NA	NA	NA	NA	NA	NA	0
rs1873747	4e-06	25483131	ROR2	9	91633578	94395860	NA	NA	NA	NA	NA	NA	0
rs10980508	1e-06	23386860	SVEP1, MUSK	9	110657479	113419759	NA	NA	NA	NA	NA	NA	0
rs5945326	7e-16	22961080	DUSP9	X	153634467	152899922	NA	NA	NA	NA	NA	NA	0
rs5945326	3e-10	20581827	DUSP9	X	153634467	152899922	NA	NA	NA	NA	NA	NA	0
rs5945326	2e-12	23945395	DUSP9	X	153634467	152899922	NA	NA	NA	NA	NA	NA	0
