# Supplementary material for: snpGeneSets: An R Package for Genome-Wide Study Annotation
Source: G3 (Bethesda). 2016 Nov 2;6(12):4087–95. doi: 10.1534/g3.116.034694 (PMC5144977; doi:10.1534/g3.116.034694)
Supplement: Supplemental Material [file supp_g3.116.034694_TableS2.xlsx]

## Sheet: Supplementary table 2
snp	gene_id	gene_name	chr	start	end	strand
rs7636	43	ACHE	7	100487615	100493754	-
rs11717195	111	ADCY5	3	123001143	123167924	-
rs11708067	111	ADCY5	3	123001143	123167924	-
rs515071	286	ANK1	8	41510744	41754280	-
rs516946	286	ANK1	8	41510744	41754280	-
rs17045328	1380	CR2	1	207627645	207663240	+
rs2284219	1395	CRHR2	7	30691559	30739719	-
rs17168486	1607	DGKB	7	14184674	14943281	-
rs2055942	2557	GABRA4	4	46920917	46996424	-
rs1799884	2645	GCK	7	44183870	44229022	-
rs10886471	2869	GRK5	10	120967197	121215131	+
rs4812829	3172	HNF4A	20	42984441	43061485	+
rs5219	3767	KCNJ11	11	17406795	17410878	-
rs5215	3767	KCNJ11	11	17406795	17410878	-
rs231362	3784	KCNQ1	11	2466221	2870340	+
rs2237897	3784	KCNQ1	11	2466221	2870340	+
rs163184	3784	KCNQ1	11	2466221	2870340	+
rs2237892	3784	KCNQ1	11	2466221	2870340	+
rs163182	3784	KCNQ1	11	2466221	2870340	+
rs8181588	3784	KCNQ1	11	2466221	2870340	+
rs2237895	3784	KCNQ1	11	2466221	2870340	+
rs10830963	4544	MTNR1B	11	92702789	92715948	+
rs10923931	4853	NOTCH2	1	120454176	120639880	-
rs3786897	5184	PEPD	19	33877855	34012799	-
rs3773506	5357	PLS1	3	142315229	142432506	+
rs3132524	5460	POU5F1	6	31132114	31138451	-
rs1801282	5468	PPARG	3	12329349	12475855	+
rs649891	5789	PTPRD	9	8314246	10612723	-
rs17584499	5789	PTPRD	9	8314246	10612723	-
rs7593730	5937	RBMS1	2	161128662	161350366	-
rs9552911	6445	SGCG	13	23755060	23899304	+
rs16861329	6480	ST6GAL1	3	186648315	186796341	+
rs10993738	6850	SYK	9	93564012	93660842	+
rs12427353	6927	HNF1A	12	121415861	121440315	+
rs4430796	6928	HNF1B	17	36046434	36105096	-
rs34872471	6934	TCF7L2	10	114709978	114927437	+
rs4506565	6934	TCF7L2	10	114709978	114927437	+
rs7903146	6934	TCF7L2	10	114709978	114927437	+
rs7901695	6934	TCF7L2	10	114709978	114927437	+
rs11165354	7049	TGFBR3	1	92145900	92371559	-
rs7612463	7325	UBE2E2	3	23244498	23632296	+
rs4458523	7466	WFS1	4	6271577	6304992	+
rs1801214	7466	WFS1	4	6271577	6304992	+
rs7957197	8638	OASL	12	121458095	121477045	-
rs8042680	9055	PRC1	15	91509268	91537881	-
rs1802295	9559	VPS26A	10	70883908	70932617	+
rs10460009	9663	LPIN2	18	2916992	3013313	-
rs7403531	10125	RASGRP1	15	38780302	38857661	-
rs1727313	10198	MPHOSPH9	12	123640943	123717785	-
rs2028299	10239	AP3S2	15	90373831	90437617	-
rs6815464	10296	MAEA	4	1283642	1333925	+
rs7178572	10363	HMG20A	15	77713018	77777945	+
rs7119	10363	HMG20A	15	77713018	77777945	+
rs1374910	10644	IGF2BP2	3	185361527	185542827	-
rs1470579	10644	IGF2BP2	3	185361527	185542827	-
rs6769511	10644	IGF2BP2	3	185361527	185542827	-
rs4402960	10644	IGF2BP2	3	185361527	185542827	-
rs231362	10984	KCNQ1OT1	11	2629558	2721228	-
rs17106184	11124	FAF1	1	50906935	51425936	-
rs6712932	11250	GPR45	2	105839595	105860085	+
rs35209784	23002	DAAM1	14	59655329	59838123	+
rs470089	25830	SULT4A1	22	44220387	44258378	-
rs11787792	26086	GPSM1	9	139221932	139254057	+
rs12899811	26276	VPS33B	15	91541774	91565833	-
rs17177078	27327	TNRC6A	16	24741028	24837548	+
rs7630877	51555	PEX5L	3	179512746	179754841	-
rs11634397	54469	ZFAND6	15	80351910	80430735	+
rs702634	54622	ARL15	5	53180578	53606403	-
rs10440833	54901	CDKAL1	6	20534688	21232635	+
rs7766070	54901	CDKAL1	6	20534688	21232635	+
rs9348440	54901	CDKAL1	6	20534688	21232635	+
rs4712523	54901	CDKAL1	6	20534688	21232635	+
rs4712524	54901	CDKAL1	6	20534688	21232635	+
rs9295474	54901	CDKAL1	6	20534688	21232635	+
rs10946398	54901	CDKAL1	6	20534688	21232635	+
rs6931514	54901	CDKAL1	6	20534688	21232635	+
rs9465871	54901	CDKAL1	6	20534688	21232635	+
rs7754840	54901	CDKAL1	6	20534688	21232635	+
rs7756992	54901	CDKAL1	6	20534688	21232635	+
rs3792615	55016	MARCH1	4	164445450	165305093	-
rs34669198	55133	SRBD1	2	45615819	45838434	-
rs73954691	55679	LIMS2	2	128395996	128439360	-
rs12571751	57178	ZMIZ1	10	80828751	81076285	+
rs6426514	58480	RHOU	1	228780394	228882416	+
rs10510110	59338	PLEKHA1	10	124134094	124191871	+
rs9470794	60685	ZFAND3	6	37787272	38161637	+
rs391300	63826	SRR	17	2207244	2228553	+
rs7578597	63892	THADA	2	43457975	43823185	-
rs9939609	79068	FTO	16	53737875	54148379	+
rs8050136	79068	FTO	16	53737875	54148379	+
rs9936385	79068	FTO	16	53737875	54148379	+
rs11642841	79068	FTO	16	53737875	54148379	+
rs12027542	80003	PCNXL2	1	233119855	233431459	-
rs16955379	80790	CMIP	16	81478775	81745367	+
rs6723108	81615	TMEM163	2	135213330	135478219	-
rs1535500	83795	KCNK16	6	39282474	39290330	-
rs319598	84105	PCBD2	5	134240810	134298336	+
rs1535500	89822	KCNK17	6	39266777	39282237	-
rs12010175	92002	FAM58A	X	152853383	152864632	-
rs1861612	92737	DNER	2	230222345	230579286	-
rs7845219	94241	TP53INP1	8	95938200	95961615	-
rs896854	94241	TP53INP1	8	95938200	95961615	-
rs1327796	114299	PALM2	9	112403068	112713756	+
rs275856	114876	OSBPL1A	18	21742009	21977846	-
rs1552224	116985	ARAP1	11	72396114	72463465	-
rs1048886	135154	C6ORF57	6	71276625	71298606	+
rs13036344	149951	COMMD7	20	31290493	31331814	-
rs824248	158038	LINGO2	9	27948084	29212998	-
rs75493593	162515	SLC16A11	17	6944949	6947242	-
rs13266634	169026	SLC30A8	8	117962512	118188953	+
rs3802177	169026	SLC30A8	8	117962512	118188953	+
rs10814916	169792	GLIS3	9	3824128	4300036	-
rs7041847	169792	GLIS3	9	3824128	4300036	-
rs312457	201232	SLC16A13	17	6939394	6943440	+
rs75493593	201232	SLC16A13	17	6939394	6943440	+
rs2261181	204010	RPSAP52	12	66151800	66220754	-
rs1531343	204010	RPSAP52	12	66151800	66220754	-
rs849134	221895	JAZF1	7	27870192	28220437	-
rs849135	221895	JAZF1	7	27870192	28220437	-
rs864745	221895	JAZF1	7	27870192	28220437	-
rs10741243	256536	TCERG1L	10	132890655	133109984	-
rs2074356	283450	HECTD4	12	112597992	112820113	-
rs8090011	284217	LAMA1	18	6941743	7117813	-
rs472265	390928	PAPL	19	39574945	39602129	+
rs12304921	613227	HIGD1C	12	51346200	51364668	+
rs515071	619554	MIR486	8	41517959	41518026	-
rs516946	619554	MIR486	8	41517959	41518026	-
rs7578326	646736	LOC646736	2	227007510	227044778	+
rs10460009	727896	LOC727896	18	2943210	2946621	-
rs11677370	728597	DCDC2C	2	3751188	3895001	+
rs4273712	728666	PRELID1P1	6	126964786	126965433	+
rs4457053	728723	ZBED3-AS1	5	76382623	76444176	+
rs564398	100048912	CDKN2B-AS1	9	21994790	22121096	+
rs1525739	100287613	LOC100287613	7	16889636	16890425	-
rs2075423	100505832	PROX1-AS1	1	213995227	214160147	-
rs4607103	100507098	ADAMTS9-AS2	3	64670546	64997143	+
rs8042680	100507118	PRC1-AS1	15	91509599	91531854	+
rs2028299	100526783	C15ORF38-AP3S2	15	90373831	90456222	-
rs138128600	100862676	RNU4-10P	13	73765665	73765804	+
rs13424957	100873381	RNA5SP111	2	165752187	165752287	-
rs896854	101927002	LOC101927002	8	95961776	95970237	+
rs2796441	101927502	LOC101927502	9	84304593	84391815	+
rs12027542	101927736	LOC101927736	1	233336174	233342252	+
rs791595	101928423	LOC101928423	7	127846863	127864484	+
rs13424957	101929633	LOC101929633	2	165701581	165815789	+
