# Supplementary material for: snpGeneSets: An R Package for Genome-Wide Study Annotation
Source: G3 (Bethesda). 2016 Nov 2;6(12):4087–95. doi: 10.1534/g3.116.034694 (PMC5144977; doi:10.1534/g3.116.034694)
Supplement: Supplemental Material [file supp_g3.116.034694_TableS3.xlsx]

## Sheet: Supplementary table 3
pid	size	genesSize	effect	sd	pval	p_perm	setName
2866	25	4	0.154874	0.0142828	6.43985e-06	0	KEGG_MATURITY_ONSET_DIABETES_OF_THE_YOUNG
2886	29	2	0.0638393	0.0132613	0.00943553	0.88172	KEGG_THYROID_CANCER
2864	47	2	0.0374269	0.0104168	0.0237417	0.983871	KEGG_TYPE_II_DIABETES_MELLITUS
2847	75	2	0.0215404	0.00824619	0.0558473	1	KEGG_B_CELL_RECEPTOR_SIGNALING_PATHWAY
2901	76	2	0.0211895	0.00819176	0.0571787	1	KEGG_ARRHYTHMOGENIC_RIGHT_VENTRICULAR_CARDIOMYOPATHY_ARVC
2759	77	2	0.0208478	0.0081384	0.0585214	1	KEGG_GLYCEROPHOSPHOLIPID_METABOLISM
2902	92	2	0.0166129	0.00744544	0.079919	1	KEGG_DILATED_CARDIOMYOPATHY
2862	102	2	0.0144816	0.00707105	0.0953529	1	KEGG_MELANOGENESIS
2824	25	1	0.0348737	0.0142828	0.120833	1	KEGG_DORSO_VENTRAL_AXIS_FORMATION
2723	26	1	0.0333353	0.0140055	0.125361	1	KEGG_GALACTOSE_METABOLISM
2733	31	1	0.0271318	0.0128264	0.147668	1	KEGG_GLYCINE_SERINE_AND_THREONINE_METABOLISM
2809	272	3	0.00590315	0.00433012	0.160727	1	KEGG_NEUROACTIVE_LIGAND_RECEPTOR_INTERACTION
2823	151	2	0.00811878	0.0058116	0.180466	1	KEGG_WNT_SIGNALING_PATHWAY
2751	44	1	0.017601	0.0107661	0.203132	1	KEGG_AMINO_SUGAR_AND_NUCLEOTIDE_SUGAR_METABOLISM
2748	46	1	0.0166129	0.0105294	0.21135	1	KEGG_N_GLYCAN_BIOSYNTHESIS
2825	47	1	0.0161503	0.0104168	0.215429	1	KEGG_NOTCH_SIGNALING_PATHWAY
2756	49	1	0.0152819	0.010202	0.223525	1	KEGG_GLYCEROLIPID_METABOLISM
2879	328	3	0.00402008	0.00394319	0.234767	1	KEGG_PATHWAYS_IN_CANCER
2747	52	1	0.0141045	0.00990336	0.235518	1	KEGG_STARCH_AND_SUCROSE_METABOLISM
2883	52	1	0.0141045	0.00990336	0.235518	1	KEGG_ENDOMETRIAL_CANCER
2817	183	2	0.0058027	0.00527909	0.240946	1	KEGG_ENDOCYTOSIS
2887	55	1	0.0130556	0.00962948	0.247333	1	KEGG_BASAL_CELL_CARCINOMA
2875	56	1	0.0127309	0.00954312	0.251232	1	KEGG_VIBRIO_CHOLERAE_INFECTION
2807	190	2	0.00540006	0.00518093	0.254393	1	KEGG_CHEMOKINE_SIGNALING_PATHWAY
2891	60	1	0.0115404	0.00921953	0.266635	1	KEGG_ACUTE_MYELOID_LEUKEMIA
2718	62	1	0.0110028	0.0090696	0.274221	1	KEGG_GLYCOLYSIS_GLUCONEOGENESIS
2880	62	1	0.0110028	0.0090696	0.274221	1	KEGG_COLORECTAL_CANCER
2797	69	1	0.0093665	0.00859725	0.300183	1	KEGG_PPAR_SIGNALING_PATHWAY
2836	69	1	0.0093665	0.00859725	0.300183	1	KEGG_COMPLEMENT_AND_COAGULATION_CASCADES
2903	73	1	0.00857237	0.00835839	0.314615	1	KEGG_VIRAL_MYOCARDITIS
2833	75	1	0.00820708	0.00824619	0.321723	1	KEGG_ADHERENS_JUNCTION
2808	76	1	0.00803164	0.00819176	0.32525	1	KEGG_PHOSPHATIDYLINOSITOL_SIGNALING_SYSTEM
2848	79	1	0.00753197	0.00803472	0.335726	1	KEGG_FC_EPSILON_RI_SIGNALING_PATHWAY
2831	84	1	0.0067785	0.00779192	0.352839	1	KEGG_ECM_RECEPTOR_INTERACTION
2892	84	1	0.0067785	0.00779192	0.352839	1	KEGG_SMALL_CELL_LUNG_CANCER
2900	85	1	0.00663845	0.00774595	0.35621	1	KEGG_HYPERTROPHIC_CARDIOMYOPATHY_HCM
2861	86	1	0.00650165	0.00770078	0.359565	1	KEGG_PROGESTERONE_MEDIATED_OOCYTE_MATURATION
2844	88	1	0.00623738	0.00761277	0.366223	1	KEGG_HEMATOPOIETIC_CELL_LINEAGE
2885	89	1	0.0061097	0.00756988	0.369527	1	KEGG_PROSTATE_CANCER
2835	90	1	0.00598485	0.00752771	0.372815	1	KEGG_GAP_JUNCTION
2849	97	1	0.00518302	0.00725101	0.395369	1	KEGG_FC_GAMMA_R_MEDIATED_PHAGOCYTOSIS
2860	101	1	0.00477473	0.00710597	0.407905	1	KEGG_GNRH_SIGNALING_PATHWAY
2846	108	1	0.004133	0.00687183	0.429242	1	KEGG_T_CELL_RECEPTOR_SIGNALING_PATHWAY
2811	114	1	0.00364567	0.00668855	0.446941	1	KEGG_OOCYTE_MEIOSIS
2822	115	1	0.00356939	0.0066594	0.449838	1	KEGG_VASCULAR_SMOOTH_MUSCLE_CONTRACTION
2816	121	1	0.0031382	0.00649219	0.466921	1	KEGG_LYSOSOME
2845	137	1	0.00217301	0.00610132	0.510014	1	KEGG_NATURAL_KILLER_CELL_MEDIATED_CYTOTOXICITY
2859	137	1	0.00217301	0.00610132	0.510014	1	KEGG_INSULIN_SIGNALING_PATHWAY
2813	138	1	0.00212012	0.00607918	0.512593	1	KEGG_UBIQUITIN_MEDIATED_PROTEOLYSIS
2730	159	1	0.00116305	0.00566351	0.563825	1	KEGG_PURINE_METABOLISM
2873	185	1	0.000279148	0.00525047	0.6201	1	KEGG_HUNTINGTONS_DISEASE
2830	201	1	-0.000151133	0.00503717	0.651183	1	KEGG_FOCAL_ADHESION
2803	267	1	-0.00138094	0.00437047	0.755415	1	KEGG_MAPK_SIGNALING_PATHWAY
2719	32	0	-0.00512626	0.0126244	1	1	KEGG_CITRATE_CYCLE_TCA_CYCLE
2720	27	0	-0.00512626	0.0137437	1	1	KEGG_PENTOSE_PHOSPHATE_PATHWAY
2721	28	0	-0.00512626	0.013496	1	1	KEGG_PENTOSE_AND_GLUCURONATE_INTERCONVERSIONS
2722	34	0	-0.00512626	0.0122474	1	1	KEGG_FRUCTOSE_AND_MANNOSE_METABOLISM
2724	25	0	-0.00512626	0.0142828	1	1	KEGG_ASCORBATE_AND_ALDARATE_METABOLISM
2725	42	0	-0.00512626	0.0110194	1	1	KEGG_FATTY_ACID_METABOLISM
2726	17	0	-0.00512626	0.0173205	1	1	KEGG_STEROID_BIOSYNTHESIS
2727	16	0	-0.00512626	0.0178535	1	1	KEGG_PRIMARY_BILE_ACID_BIOSYNTHESIS
2728	55	0	-0.00512626	0.00962948	1	1	KEGG_STEROID_HORMONE_BIOSYNTHESIS
2729	135	0	-0.00512626	0.00614635	1	1	KEGG_OXIDATIVE_PHOSPHORYLATION
2731	98	0	-0.00512626	0.00721392	1	1	KEGG_PYRIMIDINE_METABOLISM
2732	32	0	-0.00512626	0.0126244	1	1	KEGG_ALANINE_ASPARTATE_AND_GLUTAMATE_METABOLISM
2734	34	0	-0.00512626	0.0122474	1	1	KEGG_CYSTEINE_AND_METHIONINE_METABOLISM
2735	44	0	-0.00512626	0.0107661	1	1	KEGG_VALINE_LEUCINE_AND_ISOLEUCINE_DEGRADATION
2736	11	0	-0.00512626	0.0215322	1	1	KEGG_VALINE_LEUCINE_AND_ISOLEUCINE_BIOSYNTHESIS
2737	44	0	-0.00512626	0.0107661	1	1	KEGG_LYSINE_DEGRADATION
2738	54	0	-0.00512626	0.00971823	1	1	KEGG_ARGININE_AND_PROLINE_METABOLISM
2739	29	0	-0.00512626	0.0132613	1	1	KEGG_HISTIDINE_METABOLISM
2740	42	0	-0.00512626	0.0110194	1	1	KEGG_TYROSINE_METABOLISM
2741	18	0	-0.00512626	0.0168325	1	1	KEGG_PHENYLALANINE_METABOLISM
2742	40	0	-0.00512626	0.0112916	1	1	KEGG_TRYPTOPHAN_METABOLISM
2743	22	0	-0.00512626	0.0152255	1	1	KEGG_BETA_ALANINE_METABOLISM
2744	10	0	-0.00512626	0.0225831	1	1	KEGG_TAURINE_AND_HYPOTAURINE_METABOLISM
2745	26	0	-0.00512626	0.0140055	1	1	KEGG_SELENOAMINO_ACID_METABOLISM
2746	50	0	-0.00512626	0.0100995	1	1	KEGG_GLUTATHIONE_METABOLISM
2749	16	0	-0.00512626	0.0178535	1	1	KEGG_OTHER_GLYCAN_DEGRADATION
2750	30	0	-0.00512626	0.0130384	1	1	KEGG_O_GLYCAN_BIOSYNTHESIS
2752	21	0	-0.00512626	0.0155838	1	1	KEGG_GLYCOSAMINOGLYCAN_DEGRADATION
2753	22	0	-0.00512626	0.0152255	1	1	KEGG_GLYCOSAMINOGLYCAN_BIOSYNTHESIS_CHONDROITIN_SULFATE
2754	15	0	-0.00512626	0.0184391	1	1	KEGG_GLYCOSAMINOGLYCAN_BIOSYNTHESIS_KERATAN_SULFATE
2755	26	0	-0.00512626	0.0140055	1	1	KEGG_GLYCOSAMINOGLYCAN_BIOSYNTHESIS_HEPARAN_SULFATE
2757	54	0	-0.00512626	0.00971823	1	1	KEGG_INOSITOL_PHOSPHATE_METABOLISM
2758	25	0	-0.00512626	0.0142828	1	1	KEGG_GLYCOSYLPHOSPHATIDYLINOSITOL_GPI_ANCHOR_BIOSYNTHESIS
2760	33	0	-0.00512626	0.0124316	1	1	KEGG_ETHER_LIPID_METABOLISM
2761	58	0	-0.00512626	0.00937714	1	1	KEGG_ARACHIDONIC_ACID_METABOLISM
2762	29	0	-0.00512626	0.0132613	1	1	KEGG_LINOLEIC_ACID_METABOLISM
2763	19	0	-0.00512626	0.0163835	1	1	KEGG_ALPHA_LINOLENIC_ACID_METABOLISM
2764	40	0	-0.00512626	0.0112916	1	1	KEGG_SPHINGOLIPID_METABOLISM
2765	26	0	-0.00512626	0.0140055	1	1	KEGG_GLYCOSPHINGOLIPID_BIOSYNTHESIS_LACTO_AND_NEOLACTO_SERIES
2766	14	0	-0.00512626	0.0190862	1	1	KEGG_GLYCOSPHINGOLIPID_BIOSYNTHESIS_GLOBO_SERIES
2767	15	0	-0.00512626	0.0184391	1	1	KEGG_GLYCOSPHINGOLIPID_BIOSYNTHESIS_GANGLIO_SERIES
2768	40	0	-0.00512626	0.0112916	1	1	KEGG_PYRUVATE_METABOLISM
2769	16	0	-0.00512626	0.0178535	1	1	KEGG_GLYOXYLATE_AND_DICARBOXYLATE_METABOLISM
2770	33	0	-0.00512626	0.0124316	1	1	KEGG_PROPANOATE_METABOLISM
2771	34	0	-0.00512626	0.0122474	1	1	KEGG_BUTANOATE_METABOLISM
2772	17	0	-0.00512626	0.0173205	1	1	KEGG_ONE_CARBON_POOL_BY_FOLATE
2773	16	0	-0.00512626	0.0178535	1	1	KEGG_RIBOFLAVIN_METABOLISM
2774	24	0	-0.00512626	0.0145774	1	1	KEGG_NICOTINATE_AND_NICOTINAMIDE_METABOLISM
2775	16	0	-0.00512626	0.0178535	1	1	KEGG_PANTOTHENATE_AND_COA_BIOSYNTHESIS
2776	11	0	-0.00512626	0.0215322	1	1	KEGG_FOLATE_BIOSYNTHESIS
2777	64	0	-0.00512626	0.00892677	1	1	KEGG_RETINOL_METABOLISM
2778	41	0	-0.00512626	0.011153	1	1	KEGG_PORPHYRIN_AND_CHLOROPHYLL_METABOLISM
2779	15	0	-0.00512626	0.0184391	1	1	KEGG_TERPENOID_BACKBONE_BIOSYNTHESIS
2780	10	0	-0.00512626	0.0225831	1	1	KEGG_LIMONENE_AND_PINENE_DEGRADATION
2781	23	0	-0.00512626	0.0148909	1	1	KEGG_NITROGEN_METABOLISM
2782	13	0	-0.00512626	0.0198067	1	1	KEGG_SULFUR_METABOLISM
2783	41	0	-0.00512626	0.011153	1	1	KEGG_AMINOACYL_TRNA_BIOSYNTHESIS
2784	70	0	-0.00512626	0.00853562	1	1	KEGG_METABOLISM_OF_XENOBIOTICS_BY_CYTOCHROME_P450
2785	72	0	-0.00512626	0.00841624	1	1	KEGG_DRUG_METABOLISM_CYTOCHROME_P450
2786	51	0	-0.00512626	0.00999998	1	1	KEGG_DRUG_METABOLISM_OTHER_ENZYMES
2787	22	0	-0.00512626	0.0152255	1	1	KEGG_BIOSYNTHESIS_OF_UNSATURATED_FATTY_ACIDS
2788	44	0	-0.00512626	0.0107661	1	1	KEGG_ABC_TRANSPORTERS
2789	88	0	-0.00512626	0.00761277	1	1	KEGG_RIBOSOME
2790	59	0	-0.00512626	0.00929733	1	1	KEGG_RNA_DEGRADATION
2791	29	0	-0.00512626	0.0132613	1	1	KEGG_RNA_POLYMERASE
2792	36	0	-0.00512626	0.0119024	1	1	KEGG_BASAL_TRANSCRIPTION_FACTORS
2793	36	0	-0.00512626	0.0119024	1	1	KEGG_DNA_REPLICATION
2794	128	0	-0.00512626	0.00631218	1	1	KEGG_SPLICEOSOME
2795	48	0	-0.00512626	0.0103077	1	1	KEGG_PROTEASOME
2796	24	0	-0.00512626	0.0145774	1	1	KEGG_PROTEIN_EXPORT
2798	35	0	-0.00512626	0.0120712	1	1	KEGG_BASE_EXCISION_REPAIR
2799	44	0	-0.00512626	0.0107661	1	1	KEGG_NUCLEOTIDE_EXCISION_REPAIR
2800	23	0	-0.00512626	0.0148909	1	1	KEGG_MISMATCH_REPAIR
2801	28	0	-0.00512626	0.013496	1	1	KEGG_HOMOLOGOUS_RECOMBINATION
2802	14	0	-0.00512626	0.0190862	1	1	KEGG_NON_HOMOLOGOUS_END_JOINING
2804	87	0	-0.00512626	0.0076564	1	1	KEGG_ERBB_SIGNALING_PATHWAY
2805	178	0	-0.00512626	0.00535272	1	1	KEGG_CALCIUM_SIGNALING_PATHWAY
2806	267	0	-0.00512626	0.00437047	1	1	KEGG_CYTOKINE_CYTOKINE_RECEPTOR_INTERACTION
2810	128	0	-0.00512626	0.00631218	1	1	KEGG_CELL_CYCLE
2812	69	0	-0.00512626	0.00859725	1	1	KEGG_P53_SIGNALING_PATHWAY
2814	38	0	-0.00512626	0.0115849	1	1	KEGG_SNARE_INTERACTIONS_IN_VESICULAR_TRANSPORT
2815	35	0	-0.00512626	0.0120712	1	1	KEGG_REGULATION_OF_AUTOPHAGY
2818	78	0	-0.00512626	0.00808606	1	1	KEGG_PEROXISOME
2819	52	0	-0.00512626	0.00990336	1	1	KEGG_MTOR_SIGNALING_PATHWAY
2820	88	0	-0.00512626	0.00761277	1	1	KEGG_APOPTOSIS
2821	80	0	-0.00512626	0.00798434	1	1	KEGG_CARDIAC_MUSCLE_CONTRACTION
2826	56	0	-0.00512626	0.00954312	1	1	KEGG_HEDGEHOG_SIGNALING_PATHWAY
2827	86	0	-0.00512626	0.00770078	1	1	KEGG_TGF_BETA_SIGNALING_PATHWAY
2828	129	0	-0.00512626	0.00628766	1	1	KEGG_AXON_GUIDANCE
2829	76	0	-0.00512626	0.00819176	1	1	KEGG_VEGF_SIGNALING_PATHWAY
2832	134	0	-0.00512626	0.00616924	1	1	KEGG_CELL_ADHESION_MOLECULES_CAMS
2834	134	0	-0.00512626	0.00616924	1	1	KEGG_TIGHT_JUNCTION
2837	89	0	-0.00512626	0.00756988	1	1	KEGG_ANTIGEN_PROCESSING_AND_PRESENTATION
2838	17	0	-0.00512626	0.0173205	1	1	KEGG_RENIN_ANGIOTENSIN_SYSTEM
2839	102	0	-0.00512626	0.00707105	1	1	KEGG_TOLL_LIKE_RECEPTOR_SIGNALING_PATHWAY
2840	62	0	-0.00512626	0.0090696	1	1	KEGG_NOD_LIKE_RECEPTOR_SIGNALING_PATHWAY
2841	71	0	-0.00512626	0.0084753	1	1	KEGG_RIG_I_LIKE_RECEPTOR_SIGNALING_PATHWAY
2842	56	0	-0.00512626	0.00954312	1	1	KEGG_CYTOSOLIC_DNA_SENSING_PATHWAY
2843	155	0	-0.00512626	0.00573612	1	1	KEGG_JAK_STAT_SIGNALING_PATHWAY
2850	118	0	-0.00512626	0.0065742	1	1	KEGG_LEUKOCYTE_TRANSENDOTHELIAL_MIGRATION
2851	48	0	-0.00512626	0.0103077	1	1	KEGG_INTESTINAL_IMMUNE_NETWORK_FOR_IGA_PRODUCTION
2852	13	0	-0.00512626	0.0198067	1	1	KEGG_CIRCADIAN_RHYTHM_MAMMAL
2853	70	0	-0.00512626	0.00853562	1	1	KEGG_LONG_TERM_POTENTIATION
2854	126	0	-0.00512626	0.00636208	1	1	KEGG_NEUROTROPHIN_SIGNALING_PATHWAY
2855	70	0	-0.00512626	0.00853562	1	1	KEGG_LONG_TERM_DEPRESSION
2856	389	0	-0.00512626	0.00362084	1	1	KEGG_OLFACTORY_TRANSDUCTION
2857	52	0	-0.00512626	0.00990336	1	1	KEGG_TASTE_TRANSDUCTION
2858	216	0	-0.00512626	0.00485912	1	1	KEGG_REGULATION_OF_ACTIN_CYTOSKELETON
2863	67	0	-0.00512626	0.00872463	1	1	KEGG_ADIPOCYTOKINE_SIGNALING_PATHWAY
2865	44	0	-0.00512626	0.0107661	1	1	KEGG_TYPE_I_DIABETES_MELLITUS
2867	42	0	-0.00512626	0.0110194	1	1	KEGG_ALDOSTERONE_REGULATED_SODIUM_REABSORPTION
2868	44	0	-0.00512626	0.0107661	1	1	KEGG_VASOPRESSIN_REGULATED_WATER_REABSORPTION
2869	23	0	-0.00512626	0.0148909	1	1	KEGG_PROXIMAL_TUBULE_BICARBONATE_RECLAMATION
2870	169	0	-0.00512626	0.0054934	1	1	KEGG_ALZHEIMERS_DISEASE
2871	133	0	-0.00512626	0.00619239	1	1	KEGG_PARKINSONS_DISEASE
2872	53	0	-0.00512626	0.00980949	1	1	KEGG_AMYOTROPHIC_LATERAL_SCLEROSIS_ALS
2874	35	0	-0.00512626	0.0120712	1	1	KEGG_PRION_DISEASES
2876	68	0	-0.00512626	0.00866024	1	1	KEGG_EPITHELIAL_CELL_SIGNALING_IN_HELICOBACTER_PYLORI_INFECTION
2877	59	0	-0.00512626	0.00929733	1	1	KEGG_PATHOGENIC_ESCHERICHIA_COLI_INFECTION
2878	72	0	-0.00512626	0.00841624	1	1	KEGG_LEISHMANIA_INFECTION
2881	70	0	-0.00512626	0.00853562	1	1	KEGG_RENAL_CELL_CARCINOMA
2882	70	0	-0.00512626	0.00853562	1	1	KEGG_PANCREATIC_CANCER
2884	65	0	-0.00512626	0.00885783	1	1	KEGG_GLIOMA
2888	71	0	-0.00512626	0.0084753	1	1	KEGG_MELANOMA
2889	42	0	-0.00512626	0.0110194	1	1	KEGG_BLADDER_CANCER
2890	73	0	-0.00512626	0.00835839	1	1	KEGG_CHRONIC_MYELOID_LEUKEMIA
2893	54	0	-0.00512626	0.00971823	1	1	KEGG_NON_SMALL_CELL_LUNG_CANCER
2894	30	0	-0.00512626	0.0130384	1	1	KEGG_ASTHMA
2895	53	0	-0.00512626	0.00980949	1	1	KEGG_AUTOIMMUNE_THYROID_DISEASE
2896	140	0	-0.00512626	0.0060356	1	1	KEGG_SYSTEMIC_LUPUS_ERYTHEMATOSUS
2897	38	0	-0.00512626	0.0115849	1	1	KEGG_ALLOGRAFT_REJECTION
2898	42	0	-0.00512626	0.0110194	1	1	KEGG_GRAFT_VERSUS_HOST_DISEASE
2899	35	0	-0.00512626	0.0120712	1	1	KEGG_PRIMARY_IMMUNODEFICIENCY
