# Supplementary material for: snpGeneSets: An R Package for Genome-Wide Study Annotation
Source: G3 (Bethesda). 2016 Nov 2;6(12):4087–95. doi: 10.1534/g3.116.034694 (PMC5144977; doi:10.1534/g3.116.034694)
Supplement: Supplemental Material [file supp_g3.116.034694_TableS4.xlsx]

## Sheet: pid2700_gids_map
gene_id	gene_name	chr	start	end	strand
1056	CEL	9	135936741	135947250	+
1080	CFTR	7	117120017	117308719	+
1208	CLPS	6	35762759	35765121	-
1357	CPA1	7	130020290	130027949	+
1358	CPA2	7	129906703	129929638	+
1360	CPB1	3	148508917	148577979	+
1504	CTRB1	16	75252884	75258822	+
1506	CTRL	16	67963473	67965778	-
2813	GP2	16	20320896	20339684	-
5276	SERPINI2	3	167159577	167196732	-
5319	PLA2G1B	12	120759914	120765592	-
5406	PNLIP	10	118305428	118327367	+
5407	PNLIPRP1	10	118350478	118368687	+
5408	PNLIPRP2	10	118380465	118404654	+
5644	PRSS1	7	142457319	142460927	+
5646	PRSS3	9	33750464	33799229	+
5967	REG1A	2	79347584	79350545	+
5968	REG1B	2	79312149	79315150	-
6690	SPINK1	5	147204143	147218794	-
10136	CELA3A	1	22328149	22339035	+
11330	CTRC	1	15764938	15773153	+
23436	CELA3B	1	22303418	22315847	+
50624	CUZD1	10	124591671	124605691	-
63036	CELA2A	1	15783223	15798586	+
64714	PDIA2	16	333118	337215	+
154754	PRSS3P2	7	142478757	142482400	+
5645	PRSS2	7	974016	977604	+
